# Supplementary material
Source: Springer Nature journal article supplement (https://www.springermedizin.de/resource/supplementary/12890_2009_169_MOESM1_ESM.pdf/9506138)

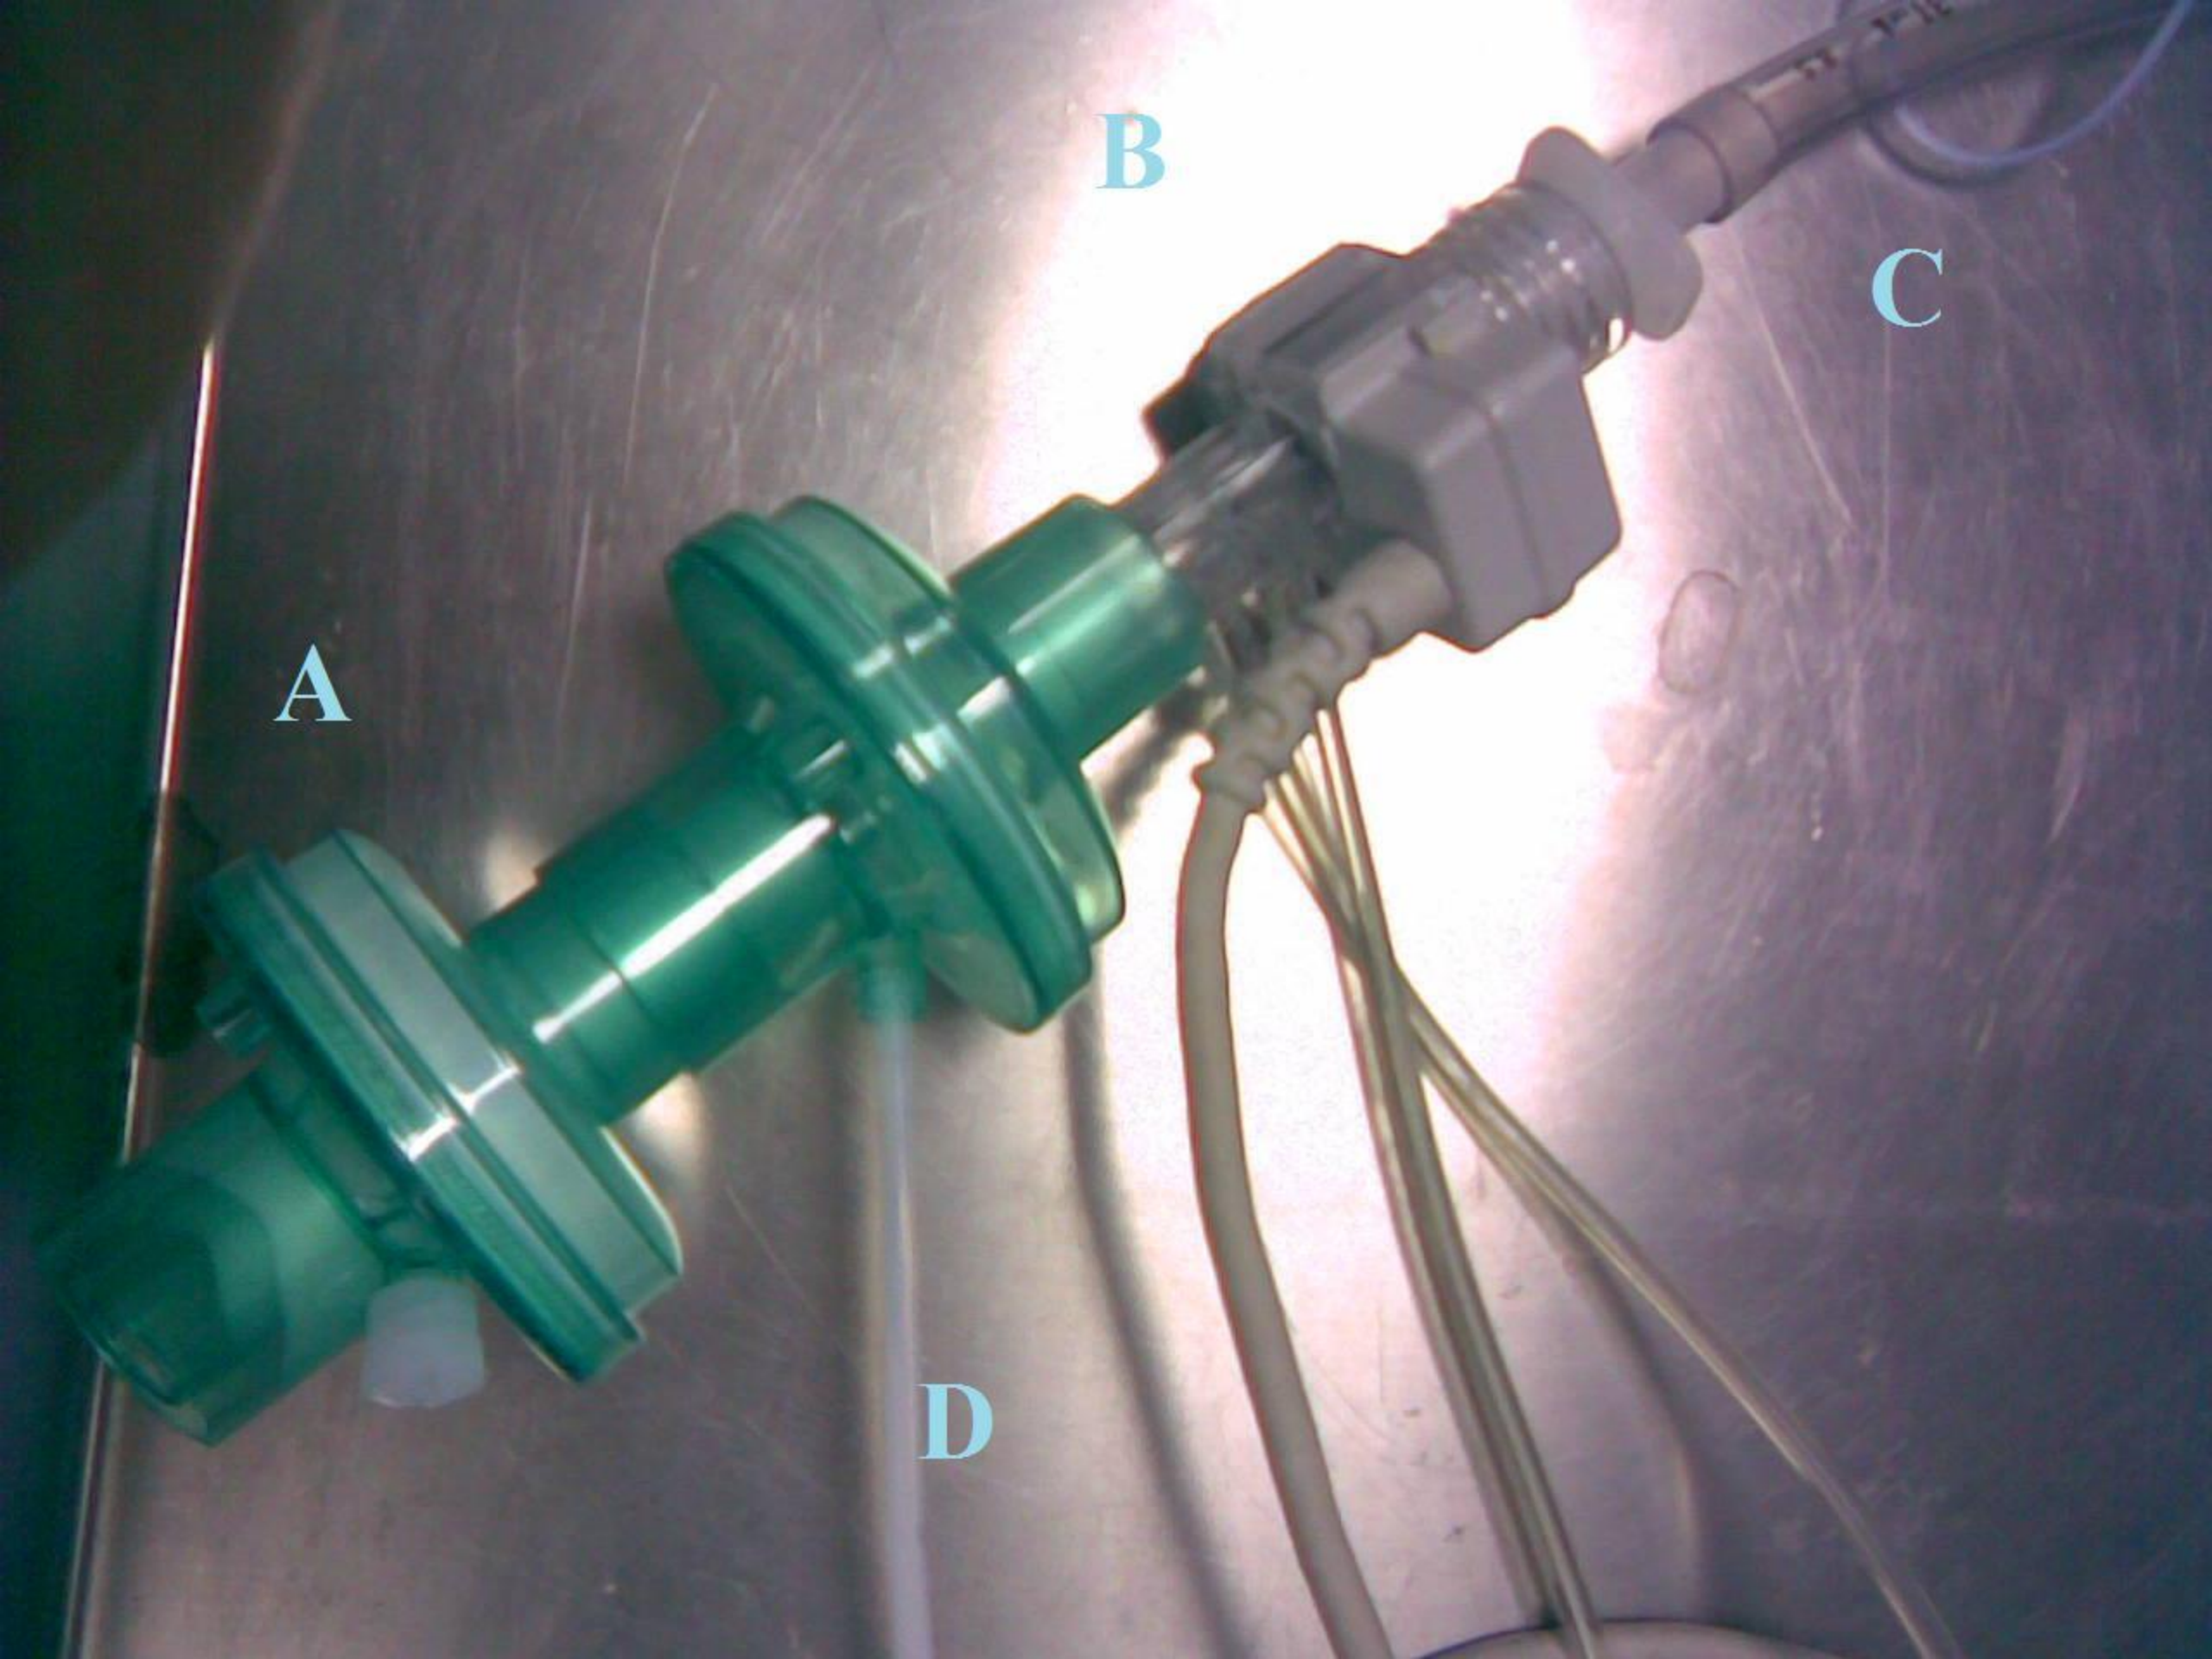

B

C

A

D

Supplement: MOESM1 [file 9506138]
